# Supplementary material for: Epithelial-Mesenchymal Plasticity Induced by Discontinuous Exposure to TGFβ1 Promotes Tumour Growth
Source: MDPI journal article supplement (doi:10.3390/biology11071046), 2022-07-12
Supplement: s1 [file s1]

# Epithelial-Mesenchymal Plasticity Induced by Discontinuous Exposure to TGF $\beta$ 1 Promotes Tumour Growth

Mafalda Santos, Marta Ferreira, Patrícia Oliveira, Nuno Mendes, Ana André, André F. Vieira, Joana B. Nunes, Joana Carvalho, Sara Rocha, Mafalda Azevedo, Daniel Ferreira, Inês Reis, João Vinagre, Joana Paredes, Alireza Heravi-Moussavi, Jorge Lima, Valdemar Máximo, Angela Burleigh, Calvin Roskelley, Fátima Carneiro, David Huntsman and Carla Oliveira

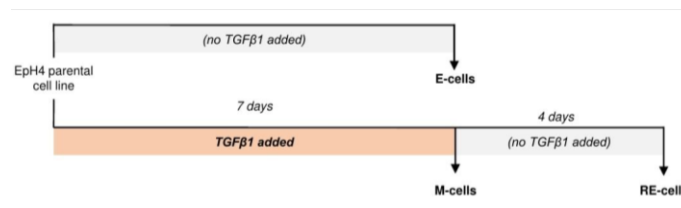

**Figure S1.** establishment of the EMT/MET in vitro model.

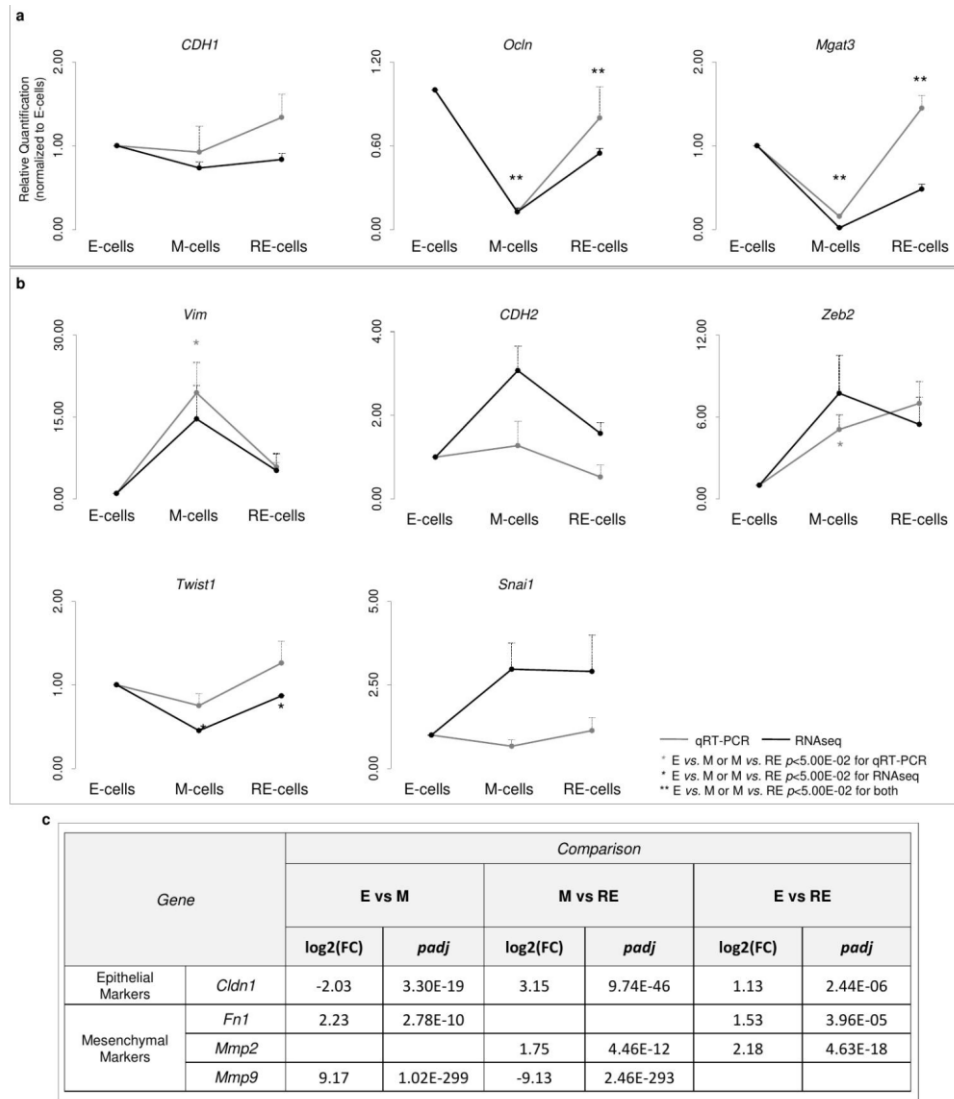

**Figure S2.** Validation of the RNAseq data with qRT PCR using distinct biological replicates of E, M and RE cells. RNAseq data were highly correlated with qRT PCR data. (a) RNA expression by RNAseq and qRT PCR of the epithelial markers CDH 1, Ocln and Mgat3 in E, M and RE cells. (b) RNA expression by RNAseq and qRT PCR of the mesenchymal/EMT markers Vim, Cdh2, Zeb2, Twist 1 and Snai1 in E, M and RE cells. (c) Differential gene expression of the epithelial marker Cldn1 and the mesenchymal markers Fn1, Mmp2 and Mmp9 in comparison to EvsM, MvsRE and EvsRE.

| ID           | Comparison | # DEGs | Sum # DEGs            |
|--------------|------------|--------|-----------------------|
| Comparison 1 | E vs M     | 2931   | 7115<br>(4211 unique) |
| Comparison 2 | M v RE     | 2336   |                       |
| Comparison 3 | E vs RE    | 1848   |                       |

Figure S3: Number of DEGs in each comparison.

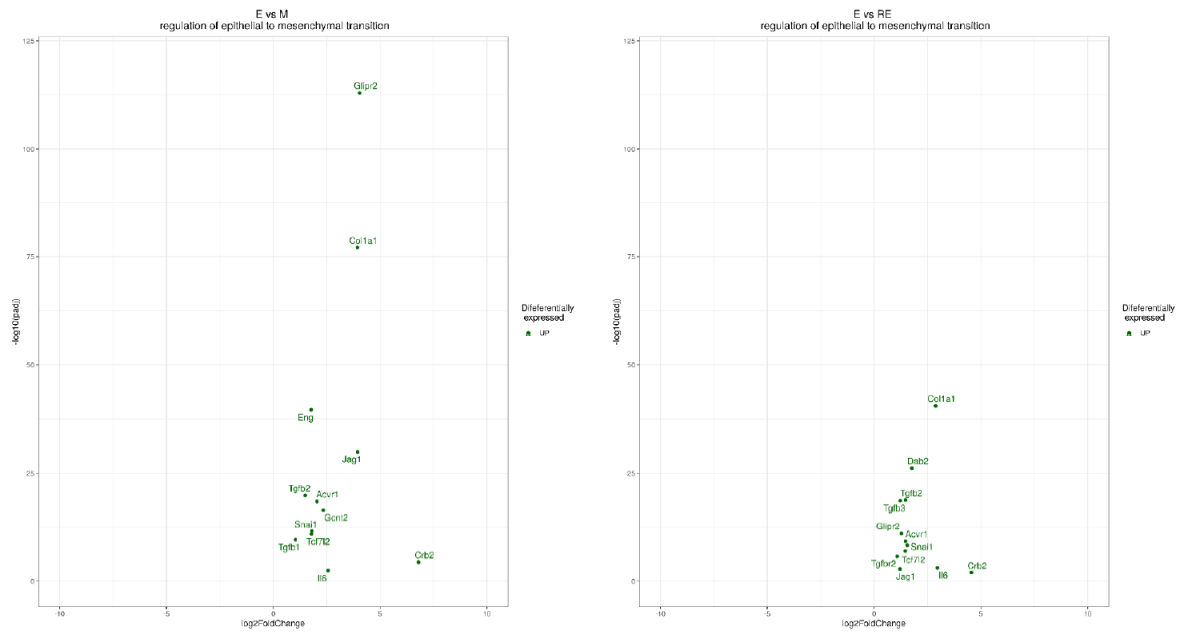

**Figure S4.** RE cells retain upregulation of mesenchymal genes. Volcano plots showing deregulated genes associated with the biological process “positive regulation of epithelial to mesenchymal transition” in E vs. M (left) and E vs. RE (right) comparisons. Genes represented in green are upregulated in M and RE cells in the left and right panels, respectively.

| Biological Functions/Pathways                        | Comparison | padj range  | # DE genes |
|------------------------------------------------------|------------|-------------|------------|
| Cellular Growth and Proliferation                    |            |             | 173        |
| regulation of epithelial cell proliferation          | E vs RE    | 5.75E-13    | 61         |
| regulation of epithelial cell proliferation          | E vs M     | 5.47E-06    | 50         |
| epithelial cell proliferation                        | E vs RE    | 9.20E-13    | 67         |
| epithelial cell proliferation                        | E vs M     | 3.14E-06    | 57         |
| epithelial cell proliferation                        | M v RE     | 5.58E-06    | 58         |
| epithelial cell proliferation                        | E vs M     | 0.00623556  | 53         |
| epithelial cell proliferation                        | M v RE     | 0.006007269 | 31         |
| positive regulation of epithelial cell proliferation | E vs M     | 0.000169584 | 34         |
| positive regulation of epithelial cell proliferation | M v RE     | 2.89E-06    | 37         |
| positive regulation of epithelial cell proliferation | M v RE     | 0.018885374 | 17         |
| regulation of mesenchymal cell proliferation         | E vs RE    | 0.000172471 | 11         |
| regulation of mesenchymal cell proliferation         | M v RE     | 0.005028173 | 10         |
| mesenchymal cell proliferation                       | E vs RE    | 0.000297495 | 12         |
| mesenchymal cell proliferation                       | M v RE     | 0.000910719 | 13         |
| positive regulation of fibroblast proliferation      | E vs RE    | 0.007400475 | 11         |
| positive regulation of fibroblast proliferation      | E vs M     | 0.001181428 | 14         |
| fibroblast proliferation                             | E vs M     | 0.010283961 | 16         |
| Cellular Migration                                   |            |             | 144        |
| tissue migration                                     | E vs M     | 3.11E-14    | 61         |
| tissue migration                                     | E vs RE    | 3.49E-12    | 52         |
| tissue migration                                     | M v RE     | 2.41E-09    | 39         |
| regulation of epithelial cell migration              | E vs M     | 1.83E-11    | 48         |
| regulation of epithelial cell migration              | E vs RE    | 2.81E-09    | 40         |
| regulation of epithelial cell migration              | M v RE     | 7.38E-09    | 33         |
| regulation of epithelial cell migration              | M v RE     | 0.000244776 | 33         |
| regulation of smooth muscle cell migration           | E vs M     | 2.86E-07    | 23         |
| regulation of smooth muscle cell migration           | M v RE     | 0.000239404 | 14         |
| regulation of smooth muscle cell migration           | M v RE     | 0.003309968 | 16         |
| epithelium migration                                 | M v RE     | 2.35E-05    | 42         |
| epithelial cell migration                            | M v RE     | 4.54E-05    | 41         |
| Stemness                                             |            |             | 48         |
| stem cell development                                | E vs M     | 0.001028317 | 16         |
| stem cell proliferation                              | E vs M     | 0.017480962 | 18         |
| stem cell proliferation                              | M v RE     | 0.044933608 | 12         |
| stem cell division                                   | E vs RE    | 0.027748376 | 8          |
| positive regulation of stem cell differentiation     | M v RE     | 0.03365355  | 6          |
| regulation of stem cell proliferation                | E vs M     | 0.035332065 | 12         |

| Biological Functions/Pathways                                  | Comparison | padj range  | # DE genes |
|----------------------------------------------------------------|------------|-------------|------------|
| Metabolism                                                     |            |             | 163        |
| positive regulation of small molecule metabolic process        | E vs RE    | 0.000348475 | 22         |
| regulation of small molecule metabolic process                 | E vs M     | 0.000745334 | 42         |
| regulation of small molecule metabolic process                 | M v RE     | 0.024347284 | 36         |
| aldehyde dehydrogenase (NAD+) activity                         | M v RE     | 0.001808179 | 7          |
| polysaccharide metabolic process                               | M v RE     | 0.007501153 | 12         |
| polysaccharide metabolic process                               | E vs M     | 0.013601786 | 15         |
| polysaccharide metabolic process                               | E vs RE    | 0.04046331  | 12         |
| regulation of ATP metabolic process                            | E vs RE    | 0.009057084 | 13         |
| phosphatidylinositol metabolic process                         | E vs RE    | 0.018908829 | 16         |
| phosphatidylinositol metabolic process                         | E vs M     | 0.009811476 | 19         |
| cellular polysaccharide metabolic process                      | M v RE     | 0.0111419   | 11         |
| amino sugar metabolic process                                  | E vs M     | 0.012888703 | 8          |
| regulation of cellular ketone metabolic process                | E vs M     | 0.016539009 | 18         |
| regulation of cellular ketone metabolic process                | M v RE     | 0.026416447 | 18         |
| hexose metabolic process                                       | M v RE     | 0.023065391 | 26         |
| hexose metabolic process                                       | E vs M     | 0.048632048 | 26         |
| regulation of polysaccharide metabolic process                 | E vs M     | 0.026247261 | 8          |
| NAD+ nucleosidase activity                                     | E vs RE    | 0.032040672 | 4          |
| cellular polysaccharide metabolic process                      | E vs M     | 0.032635529 | 13         |
| NADPH oxidase complex                                          | M v RE     | 0.032806102 | 3          |
| oxidoreductase activity, acting on NAD(P)H, oxygen as acceptor | M v RE     | 0.039744915 | 4          |
| Cancer                                                         |            |             | 214        |
| Proteoglycans in cancer                                        | E vs M     | 1.82E-06    | 52         |
| Proteoglycans in cancer                                        | M v RE     | 1.27E-06    | 48         |
| Proteoglycans in cancer                                        | E vs RE    | 0.000204    | 35         |
| Breast cancer                                                  | E vs M     | 0.005959    | 31         |
| Breast cancer                                                  | M v RE     | 0.001296    | 30         |
| Breast cancer                                                  | E vs RE    | 0.001748    | 25         |
| Small cell lung cancer                                         | E vs M     | 0.01103     | 21         |
| Small cell lung cancer                                         | M v RE     | 0.017449    | 18         |
| Small cell lung cancer                                         | E vs RE    | 0.023162    | 15         |
| Prostate cancer                                                | E vs M     | 0.011518    | 22         |
| Prostate cancer                                                | M v RE     | 0.017449    | 19         |
| Prostate cancer                                                | E vs RE    | 0.004617    | 18         |
| Choline metabolism in cancer                                   | E vs M     | 0.019341    | 21         |
| Transcriptional misregulation in cancer                        | E vs M     | 0.034637    | 34         |
| Transcriptional misregulation in cancer                        | M v RE     | 2.75E-05    | 42         |
| Transcriptional misregulation in cancer                        | E vs RE    | 0.034835    | 25         |
| Bladder cancer                                                 | M v RE     | 0.003617    | 12         |
| Bladder cancer                                                 | E vs RE    | 0.049247    | 8          |
| Gastric cancer                                                 | M v RE     | 0.010737    | 27         |
| Gastric cancer                                                 | E vs RE    | 0.008585    | 23         |
| Non-small cell lung cancer                                     | M v RE     | 0.043233    | 14         |
| Central carbon metabolism in cancer                            | E vs RE    | 0.005668    | 14         |
| PD-L1 expression and PD-1 checkpoint pathway in cancer         | E vs RE    | 0.017637    | 15         |
| Colorectal cancer                                              | E vs RE    | 0.037883    | 14         |
| Pancreatic cancer                                              | E vs RE    | 0.049247    | 12         |

**Figure S5.** Top significantly enriched biological functions or pathways derived from the 4211 differentially expressed genes across E, M and RE cells.

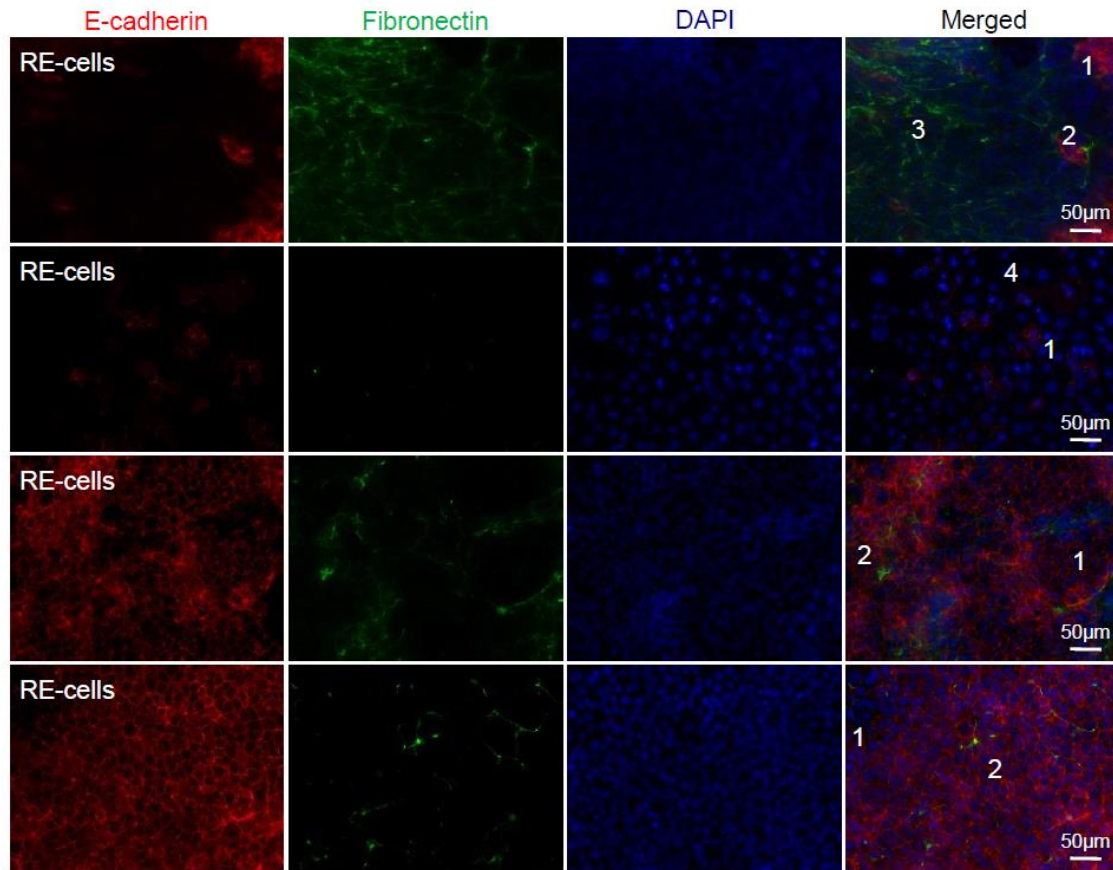

**Figure S6: The 4 RE cell subpopulations co-exist spatially.** (a) Representative images of different microscope fields of RE cells stained for E cadherin (red) and Fibronectin (green), displaying the 4 RE cells subpopulations labelled from 1–4: (1) E-cadherin<sup>+</sup>/Fibronectin<sup>-</sup>, (2) E-cadherin<sup>+</sup>/Fibronectin<sup>+</sup>, (3) E-cadherin<sup>-</sup>/Fibronectin<sup>+</sup> and (4) E-cadherin<sup>-</sup>/Fibronectin<sup>-</sup>. DAPI (blue) is also represented, and all channels are merged.

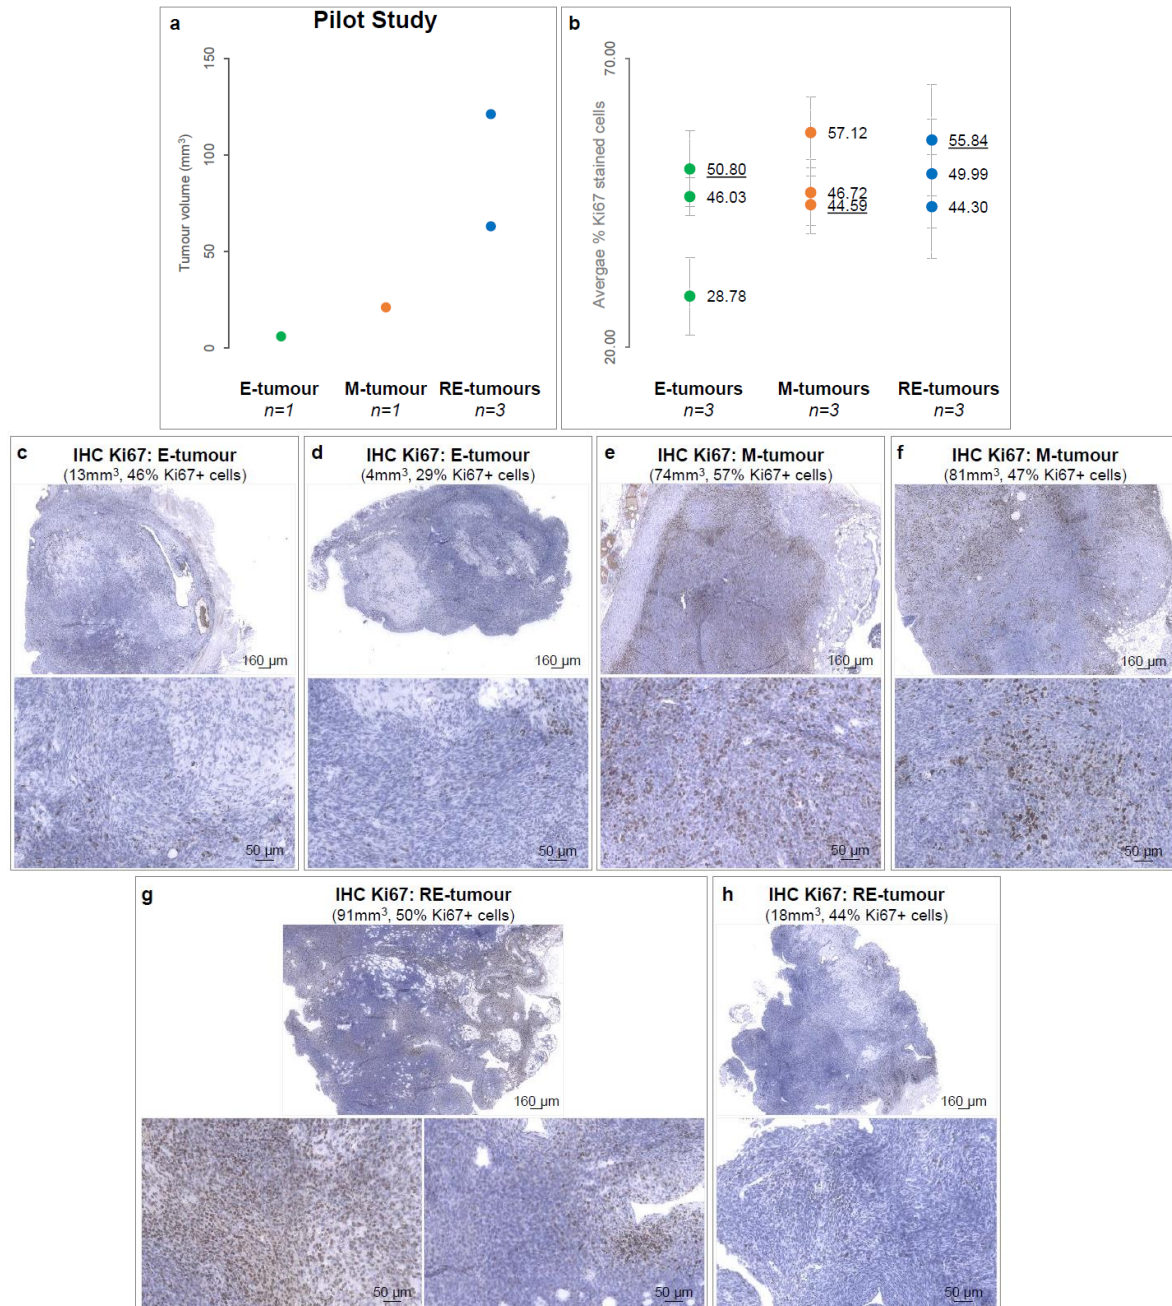

**Figure S7.** Mice experiments. (a) Pilot in vivo tumourigenicity assay for E, M and RE cells, with M and RE cell-originated tumours having larger volumes than those of E cells. (b) Average percentage of cells positive for Ki 67 staining in 3 E tumours, 3 M tumours and 3 RE tumours. (c–h) Representative images of immunohistochemistry staining for Ki 67 in 2 E tumours, 2 M tumours and 2 RE tumours. Top and bottom images show different magnifications.



|                                                                                                           |                                                                                    |                                                                                                         |                                                                                                                                                                                                                                              |
|-----------------------------------------------------------------------------------------------------------|------------------------------------------------------------------------------------|---------------------------------------------------------------------------------------------------------|----------------------------------------------------------------------------------------------------------------------------------------------------------------------------------------------------------------------------------------------|
|                                                                                                           | 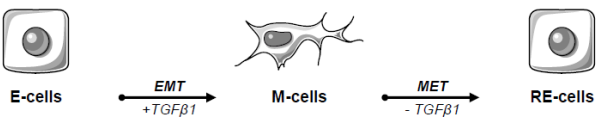 |                                                                                                         |                                                                                                                                                                                                                                              |
| <b>Brightfield morphology</b><br>(Phenotype)                                                              | Cobblestone                                                                        | Fibroblastoid                                                                                           | Cobblestone                                                                                                                                                                                                                                  |
| <b>Proliferation assay</b><br>(BrdU average %)                                                            | High<br>(49%)                                                                      | Low<br>(34%)                                                                                            | High<br>(52%)                                                                                                                                                                                                                                |
| <b>Wound healing assay</b><br>(Wound closing pattern)                                                     | Collective                                                                         | Single-cell                                                                                             | Collective & Single-cell                                                                                                                                                                                                                     |
| <b>Focus formation assay</b><br>(Phenotype)                                                               | Dome-like structures                                                               | Foci                                                                                                    | Dome-like & Foci                                                                                                                                                                                                                             |
| <b>In vivo Tumorigenicity</b><br>(Tumor volume)                                                           | Low<br>(3-25 mm <sup>3</sup> )                                                     | High<br>(32-343 mm <sup>3</sup> )                                                                       | High<br>(5-304mm <sup>3</sup> )                                                                                                                                                                                                              |
| <b>First-Passage Mammosphere-forming efficiency</b> (Average %)                                           | Low<br>(0.5%)                                                                      | High<br>(1.2%)                                                                                          | High<br>(1.2%)                                                                                                                                                                                                                               |
| <b>Metabolic signature</b><br>(WB: HKII, LDH, ND1, NDUFS3, Rate of lactate produced per glucose consumed) | OxPhos Active &<br>Low Lactate                                                     | OxPhos Inactive &<br>High Lactate                                                                       | OxPhos Active &<br>Low Lactate                                                                                                                                                                                                               |
| <b>Phenotypic heterogeneity</b><br>(IF: E-cadherin/Fibronectin)                                           | <b>Homogeneous</b><br>E-cadherin <sup>+</sup> / Fibronectin <sup>-</sup>           | <b>Homogeneous</b><br>E-cadherin <sup>+</sup> / Fibronectin <sup>+</sup><br>(Non-functional E-cadherin) | <b>Heterogeneous</b><br>E-cadherin <sup>+</sup> / Fibronectin <sup>-</sup><br>E-cadherin <sup>+</sup> / Fibronectin <sup>+</sup><br>E-cadherin <sup>-</sup> / Fibronectin <sup>+</sup><br>E-cadherin <sup>-</sup> / Fibronectin <sup>-</sup> |

**Figure S8.** Summary of the phenotypic and functional properties of E, M and RE cells. Properties analysed were brightfield morphology, proliferation, wound healing closure, first passage mammosphere-forming efficiency, focus formation ability, phenotypic heterogeneity by E-cadherin/Fibronectin immunofluorescence and in vivo tumourigenicity (final tumour volumes).
